# Supplementary material for: Macrophagic CD146 promotes foam cell formation and retention during atherosclerosis
Source: PubMed Central journal article supplement (PMC5339843; doi:10.1038/cr.2017.8), 2017-01-13
Supplement: cr20178x1.pdf [file cr20178x1.pdf]

**A**

```

-684 GCGAATTCAGCCCCCTCCTTCTTCTCTGGTCAAAGGCTAGACTTGCAGGAGCTTGC
      NF-κB binding site -621
-628 GTTTGAA GGGACAGCCC AGAAGGCATCGTCTGCACTCCCCATACAGGTACTTCTGGGT
-572 CTGTGGGACTGGCGCAGGGTTCTTCTCCCAAAGCTGCCAGCACTGAGGCTGAGGCAG
-515 TGTCAGGCCGGCGGCAGCGGCAGTGGTGAATCGTTCTGGGAAGCGATAGAGGCCG
      NF-κB binding site -420
-459 GCCTGAATTCTCTGTGGCAAGGGAGGGGAGCCCAAG GGGAGGCCCTTGGGGACA
-403 CCGAGGACCAGGTCCGCTACTGCTCCTCCCCAGGAGGTCCCCTAGGGGCTACATTG
-347 GCTGGCAGGGGCTGAGCAGCGGTGAGCCTGGCTGGCTTCGACCCGGGGCGACTCC
-291 GGGCATCCGGGACAGCTTCTCCTCGCTGCCACCTCGGCCAGTCAGACCCCGAGACAC
-234 CTGTCACTACCCCTCAGCCTTCCAAGCCAGGAGCCTGGGAGTCCGGCTCTGGCCT
-178 ACCTCCGGCAGCGCTCCTAGGCGCAGCTCCCGGGCTGGCGGGCGCCGGGGCCCGCC
-122 CCCTAGGGCTGCGGGCGCGGGGCGGGGGCTGGGGGCTGCGCGGGCGGGGGCGG
-66  GCCCGGGCGCTCCGGGCCCTCCCCGCCCCCTGACGTGAGCCCCGGCAGCCT
-10  CGAGCTGCTC A CTTGGCTCTCGCCCTCCGGCCGGGAAGCATG
  
```

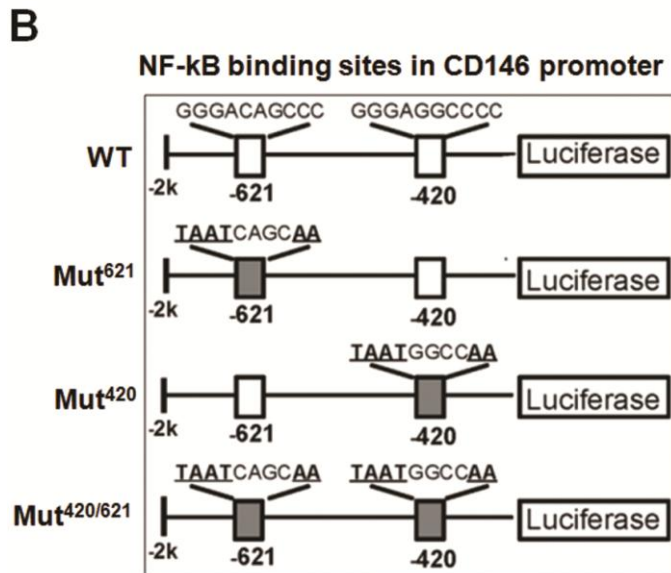

**Supplementary information, Figure S1 (A)** The CD146 promoter sequence with NF-κB binding sites boxed in red. **(B)** Schematic overview of mutant constructs of NF-κB binding sites is shown.
