# Supplementary material for: Macrophagic CD146 promotes foam cell formation and retention during atherosclerosis
Source: PubMed Central journal article supplement (PMC5339843; doi:10.1038/cr.2017.8), 2017-01-13
Supplement: cr20178x2.pdf [file cr20178x2.pdf]

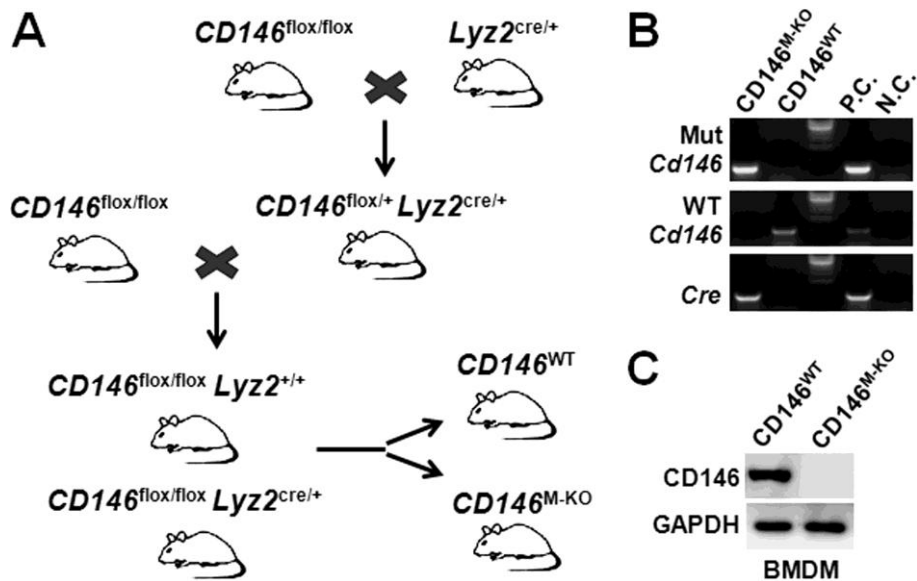

**Supplementary information, Figure S2** Generation of macrophage-specific CD146 knockout mice. (A) Mating scheme to generate macrophage-specific CD146 knockout mice ( $Lyz2^{cre/+} CD146^{flox/flox}$ , namely  $CD146^{M-KO}$ ) and control WT littermates ( $Lyz2^{+/+} CD146^{flox/flox}$ , namely  $CD146^{WT}$ ). (B) Genotyping of  $CD146^{M-KO}$  and  $CD146^{WT}$  mice by PCR analysis of genomic DNA. A 595-bp fragment from wild-type *Cre* gene, a 550-bp fragment from wild-type *Cd146* gene (WT *Cd146*) and a 502-bp fragment from floxed *Cd146* gene (Mut *Cd146*) were PCR-amplified with specific primers. Genomic DNA from  $Lyz2^{cre/+}$  mice was used as positive control (P.C.) for *Cre* analysis; Genomic DNA from  $CD146^{flox/flox}$  mice were used as P.C. for Mut *Cd146* analysis; genomic DNA from C57BL/6 mice were used as P.C. for WT *Cd146* analysis. H<sub>2</sub>O was used as negative control (N.C.) for all three PCR analyses. (C) Characterization of BMDMs isolated from  $CD146^{WT}$  or  $CD146^{M-KO}$  mice by western blot using specific antibodies as indicated.
