# Supplementary material for: Macrophagic CD146 promotes foam cell formation and retention during atherosclerosis
Source: PubMed Central journal article supplement (PMC5339843; doi:10.1038/cr.2017.8), 2017-01-13
Supplement: cr20178x3.pdf [file cr20178x3.pdf]

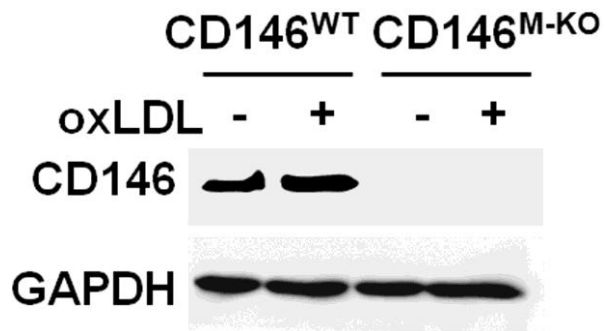

**Supplementary information, Figure S3** Western blot analysis of CD146 expression in oxLDL-stimulated (50  $\mu\text{g/ml}$ ) BMDMs isolated from CD146<sup>WT</sup> or CD146<sup>M-KO</sup> mice. GAPDH was used as a loading control. The data represent three independent experiments.
