# Supplementary material for: Macrophagic CD146 promotes foam cell formation and retention during atherosclerosis
Source: PubMed Central journal article supplement (PMC5339843; doi:10.1038/cr.2017.8), 2017-01-13
Supplement: cr20178x4.pdf [file cr20178x4.pdf]

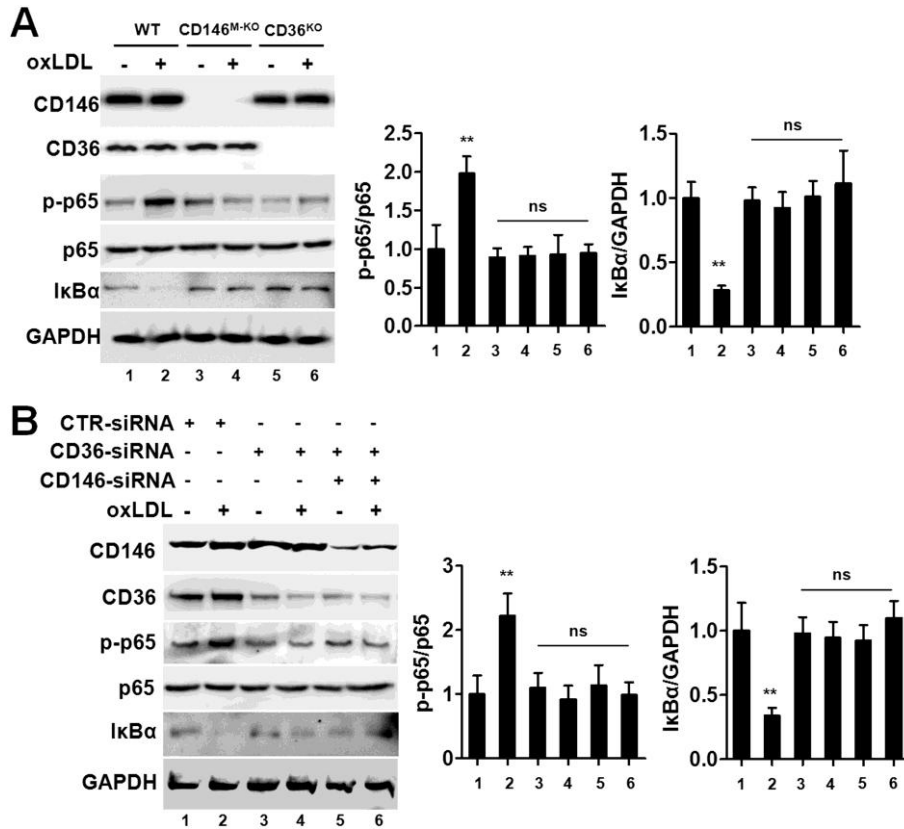

**Supplementary information, Figure S4** NF-κB activation in response to oxLDL is CD36-dependent. (A, B) Western blot analysis of IκBα, phosphorylated (p-) and total NF-κB p65 in oxLDL- (50 ng/ml) stimulated BMDMs isolated from WT (wild type), CD146<sup>M-KO</sup> and CD36<sup>KO</sup> mice (A) or WT BMDMs with or without pretreatment with anti-CD146 AA98 (50 μg/ml) (B). GAPDH was used as a loading control. Right panel: the quantification of relative expression of p-p65 and IκBα. Two-way ANOVA test. \*\**P* < 0.01. The data represent three independent experiments.
