# Supplementary material for: Macrophagic CD146 promotes foam cell formation and retention during atherosclerosis
Source: PubMed Central journal article supplement (PMC5339843; doi:10.1038/cr.2017.8), 2017-01-13
Supplement: cr20178x5.pdf [file cr20178x5.pdf]

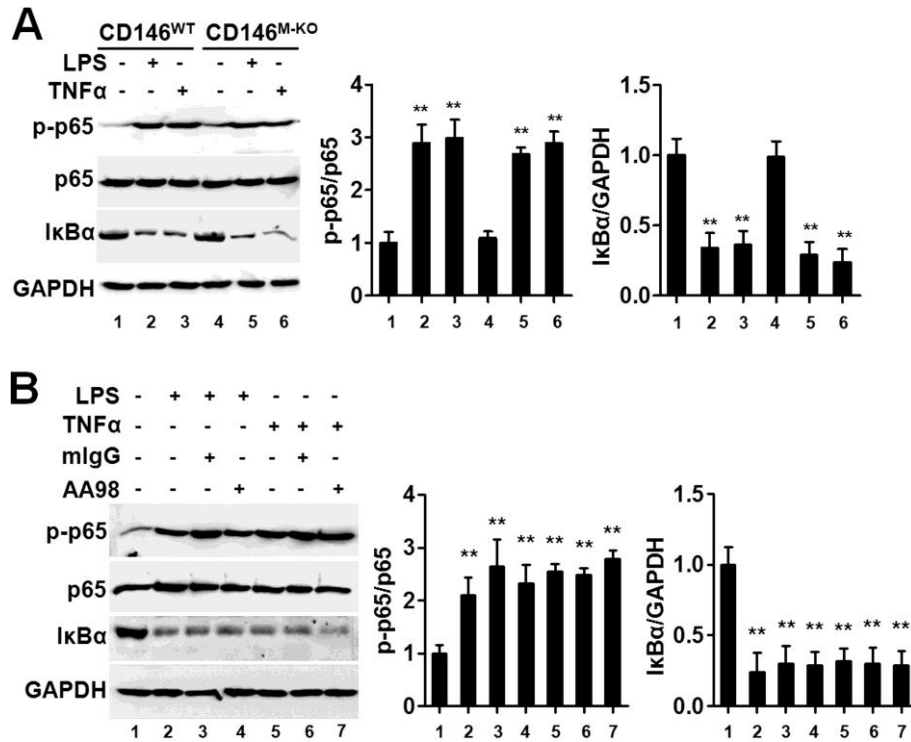

**Supplementary information, Figure S5** CD146 is not required for LPS- or TNF $\alpha$ -induced NF- $\kappa$ B activation. (**A**, **B**) Western blot analysis of I $\kappa$ B $\alpha$ , phosphorylated (p-) and total NF- $\kappa$ B p65 in LPS- (10  $\mu$ g/ml) or TNF $\alpha$ - (50 ng/ml) stimulated BMDMs isolated from CD146<sup>WT</sup> or CD146<sup>M-KO</sup> mice (**A**) or BMDMs with or without pretreatment with anti-CD146 AA98 (50  $\mu$ g/ml) (**B**). GAPDH was used as a loading control. Right panel: the quantification of relative expression of p-p65 and I $\kappa$ B $\alpha$ . Two-way ANOVA test. **\*\*** $P < 0.01$ . The data represent three independent experiments.
