# Supplementary material for: Macrophagic CD146 promotes foam cell formation and retention during atherosclerosis
Source: PubMed Central journal article supplement (PMC5339843; doi:10.1038/cr.2017.8), 2017-01-13
Supplement: cr20178x6.pdf [file cr20178x6.pdf]

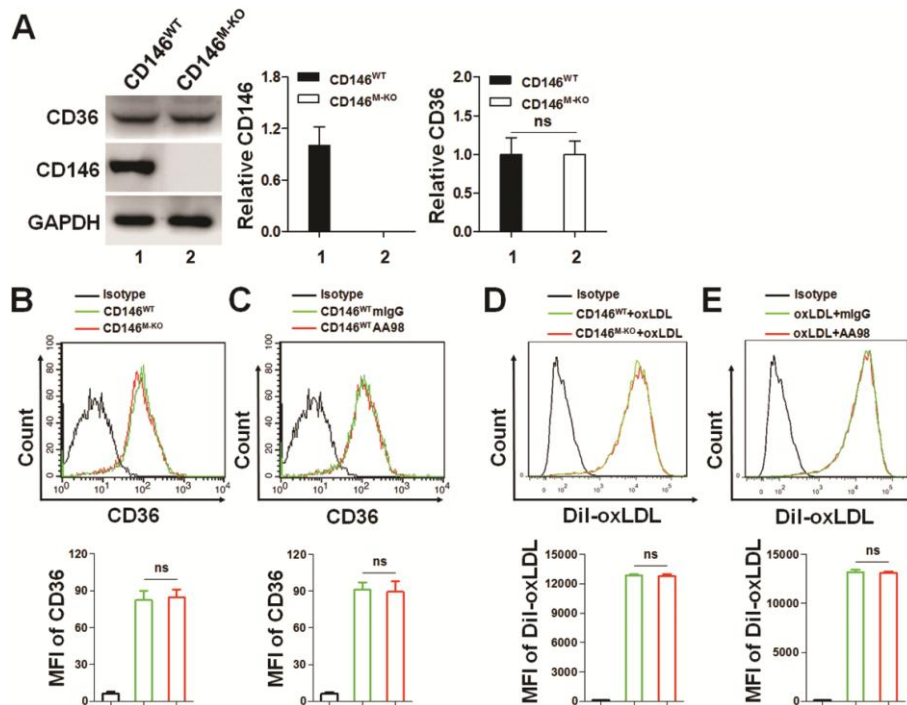

**Supplementary information, Figure S6** CD146 is not required for binding of oxLDL to macrophages. **(A)** Western blot analysis of CD146 and CD36 expression in BMDMs isolated from CD146<sup>WT</sup> or CD146<sup>M-KO</sup> mice. GAPDH served as a loading control. Right panel: quantification of relative expression of CD146 and CD36. **(B)** The BMDMs were incubated with oxLDL at 4 °C for 15 min to prevent endocytosis. Flow cytometric analysis of CD36 expression in BMDMs isolated from CD146<sup>WT</sup> or CD146<sup>M-KO</sup> mice. **(C)** Flow cytometric analysis of CD36 expression in BMDMs that were treated with mIgG or anti-CD146 AA98 (50 µg/ml). Bottom panel: quantification of the MFI of CD36 in each group (n = 5). **(D)** The BMDMs were incubated with Dil-oxLDL at 4 °C for 15 min to prevent endocytosis. Flow cytometric analysis of the binding of Dil-oxLDL to BMDMs isolated from CD146<sup>WT</sup> or CD146<sup>M-KO</sup> mice. **(E)** Flow cytometric analysis of the binding of Dil-oxLDL to BMDMs that were treated with mIgG or anti-CD146 AA98 (50 µg/ml). Bottom panel: quantification of the MFI of Dil-oxLDL in each group (n = 5). The data represent three independent experiments.
