# Supplementary material for: Macrophagic CD146 promotes foam cell formation and retention during atherosclerosis
Source: PubMed Central journal article supplement (PMC5339843; doi:10.1038/cr.2017.8), 2017-01-13
Supplement: cr20178x7.pdf [file cr20178x7.pdf]

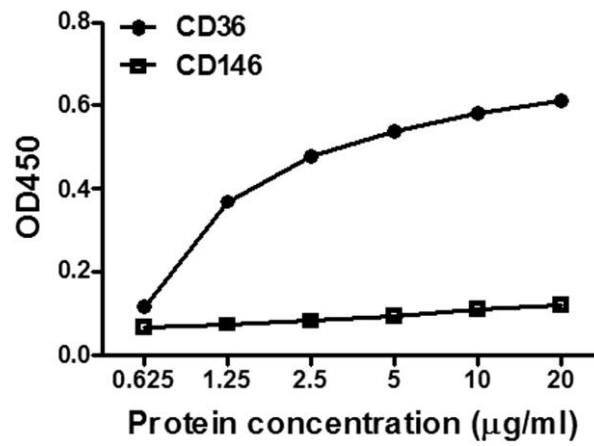

**Supplementary information, Figure S7** CD36 but not CD146 binds to oxLDL. Different concentrations of His-tagged CD36 or CD146 were added to wells coated with oxLDL (5 µg/ml), and enzyme-linked immunosorbent assay was performed. The data represent three independent experiments.
