# Supplementary material for: Macrophagic CD146 promotes foam cell formation and retention during atherosclerosis
Source: PubMed Central journal article supplement (PMC5339843; doi:10.1038/cr.2017.8), 2017-01-13
Supplement: cr20178x8.pdf [file cr20178x8.pdf]

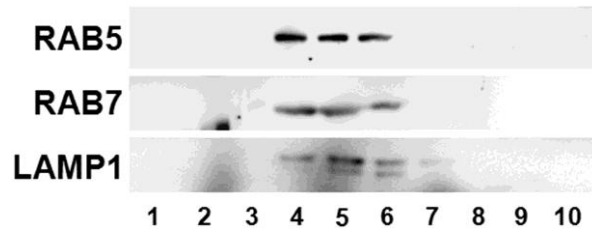

**Supplementary information, Figure S8** Immunoblot analysis of gradient fractions with markers (Rab5, Rab7, and LAMP1) specific to endosomes. The endosomal fractions were isolated by differential centrifugation in a discontinuous sucrose gradient (consisting of three steps: 8%, 35%, and 42% sucrose). The data represent three independent experiments.
