# Supplementary material for: Macrophagic CD146 promotes foam cell formation and retention during atherosclerosis
Source: PubMed Central journal article supplement (PMC5339843; doi:10.1038/cr.2017.8), 2017-01-13
Supplement: cr20178x10.pdf [file cr20178x10.pdf]

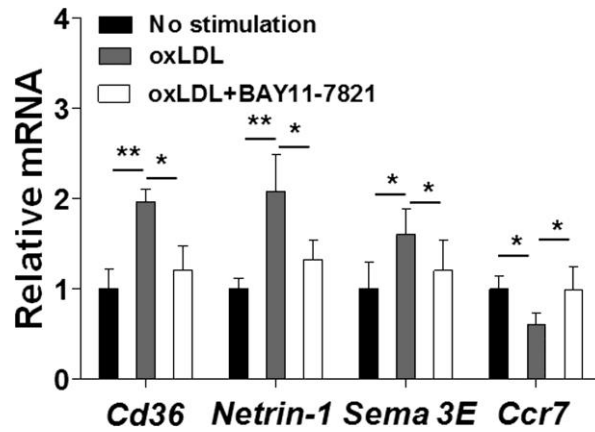

**Supplementary information, Figure S10** Quantitative real-time RT-PCR analysis of mRNA levels of the macrophage migratory factors *Cd36*, *Netrin-1*, *Sema 3E* and *Ccr7* in BMDMs that were incubated with oxLDL (50  $\mu\text{g/ml}$ ) for 24 h in the presence or absence of NF- $\kappa\text{B}$  inhibitor BAY11-7082 (20  $\mu\text{M}$ ). \* $P < 0.05$ , \*\* $P < 0.01$ . The data represent three independent experiments.
