# Supplementary material for: Macrophagic CD146 promotes foam cell formation and retention during atherosclerosis
Source: PubMed Central journal article supplement (PMC5339843; doi:10.1038/cr.2017.8), 2017-01-13
Supplement: cr20178x11.pdf [file cr20178x11.pdf]

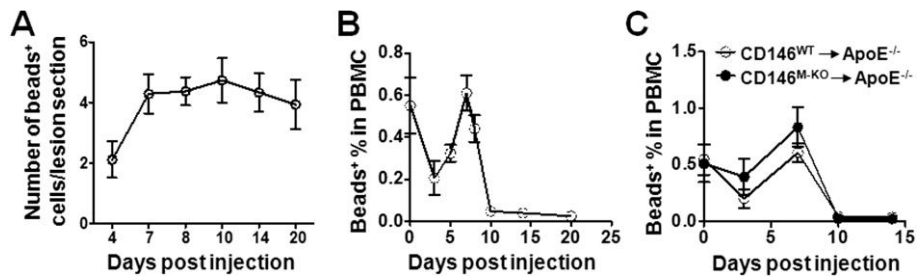

**Supplementary information, Figure S11** (A) Quantification of the number of bead-labeled macrophages in atherosclerotic plaques of ApoE<sup>-/-</sup> mice in a monocyte bead-tracking model. The data are presented as bead-labeled macrophages per plaque on the indicated days after monocyte labeling. (B) Quantification of the bead<sup>+</sup> cells among peripheral blood mononuclear cells (PBMCs) of ApoE<sup>-/-</sup> mice on the indicated days after bead transfer in the monocyte bead-tracking model. (C) Quantification of the bead<sup>+</sup> cells among PBMCs of CD146<sup>WT</sup>→ApoE<sup>-/-</sup> or CD146<sup>M-KO</sup>→ApoE<sup>-/-</sup> chimeric mice on the indicated days after bead transfer. Data are representative of one experiment each with five mice for each indicated day (A, B) or six mice per genotype (C).
