# Supplementary material for: Macrophagic CD146 promotes foam cell formation and retention during atherosclerosis
Source: PubMed Central journal article supplement (PMC5339843; doi:10.1038/cr.2017.8), 2017-01-13
Supplement: cr20178x12.pdf [file cr20178x12.pdf]

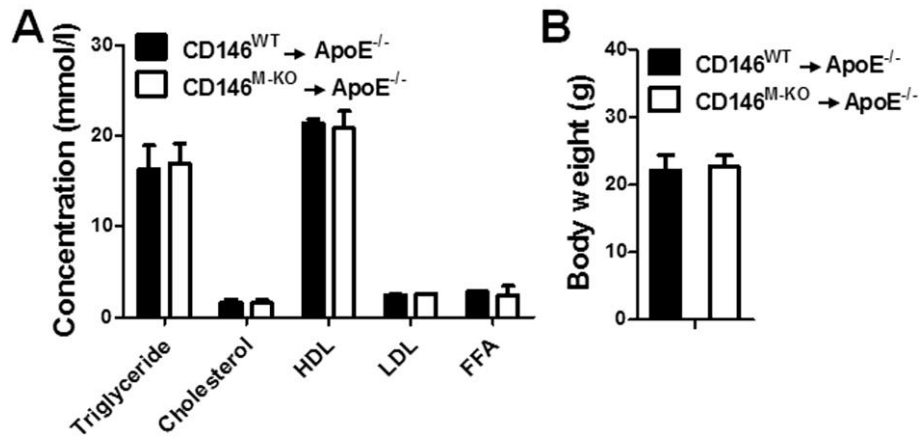

**Supplementary information, Figure S12** Metabolic parameters (**A**) and body weight (**B**) of CD146<sup>WT</sup>→ApoE<sup>-/-</sup> and CD146<sup>M-KO</sup>→ApoE<sup>-/-</sup> chimeric mice (n = 10) that fed a Western diet for 12 weeks.
