# Supplementary material for: Macrophagic CD146 promotes foam cell formation and retention during atherosclerosis
Source: PubMed Central journal article supplement (PMC5339843; doi:10.1038/cr.2017.8), 2017-01-13
Supplement: cr20178x13.pdf [file cr20178x13.pdf]

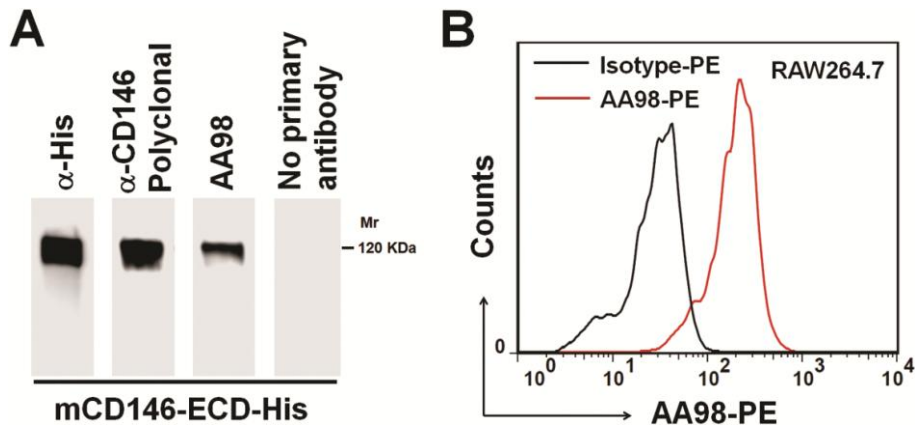

**Supplementary information, Figure S13** The anti-CD146 monoclonal antibody AA98 recognizes murine CD146. **(A)** His-tagged murine CD146 protein was detected with antibodies of anti-His-tag, anti-CD146 polyclonal antibody, and AA98. **(B)** The CD146 expression in RAW264.7 cells was detected with AA98-PE. The data represent three independent experiments.
