# Supplementary material for: Macrophagic CD146 promotes foam cell formation and retention during atherosclerosis
Source: PubMed Central journal article supplement (PMC5339843; doi:10.1038/cr.2017.8), 2017-01-13
Supplement: cr20178x14.pdf [file cr20178x14.pdf]

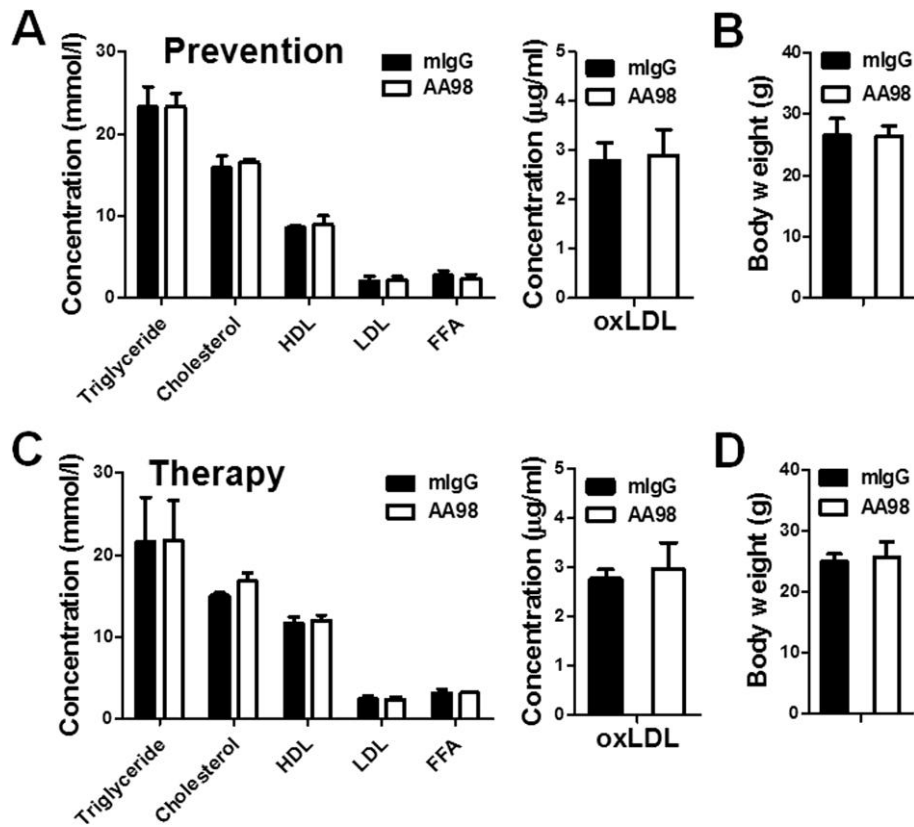

**Supplementary information, Figure S14** Metabolic parameters and body weight of ApoE<sup>-/-</sup> mice that were preventively (n = 8) (A, B) or therapeutically (n = 5) (C, D) injected with mIgG or anti-CD146 AA98.
