# Supplementary material for: Macrophagic CD146 promotes foam cell formation and retention during atherosclerosis
Source: PubMed Central journal article supplement (PMC5339843; doi:10.1038/cr.2017.8), 2017-01-13
Supplement: cr20178x15.pdf [file cr20178x15.pdf]

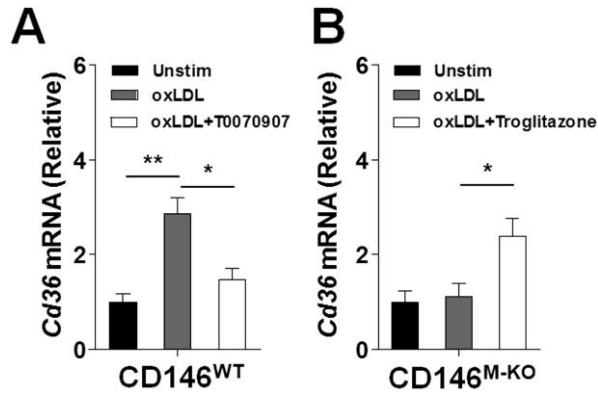

**Supplementary information, Figure S15** (A) Quantitative real-time RT-PCR analysis of mRNA levels of *Cd36* in BMDMs (isolated from CD146<sup>M-KO</sup> mice) that were treated with oxLDL (50 µg/ml) for 24 h in the presence or absence of the PPAR $\gamma$  antagonist T0070907 (1 µM). (B) Quantitative real-time RT-PCR analysis of mRNA levels of *Cd36* in BMDMs (isolated from CD146<sup>M-KO</sup> mice) that were treated with oxLDL (50 µg/ml) for 24 h in the presence or absence of the PPAR $\gamma$  agonist troglitazone (40 µM). \* $P < 0.05$ , \*\* $P < 0.01$ . The data represent three independent experiments.
