# Supplementary material for: Macrophagic CD146 promotes foam cell formation and retention during atherosclerosis
Source: PubMed Central journal article supplement (PMC5339843; doi:10.1038/cr.2017.8), 2017-01-13
Supplement: cr20178x16.pdf [file cr20178x16.pdf]

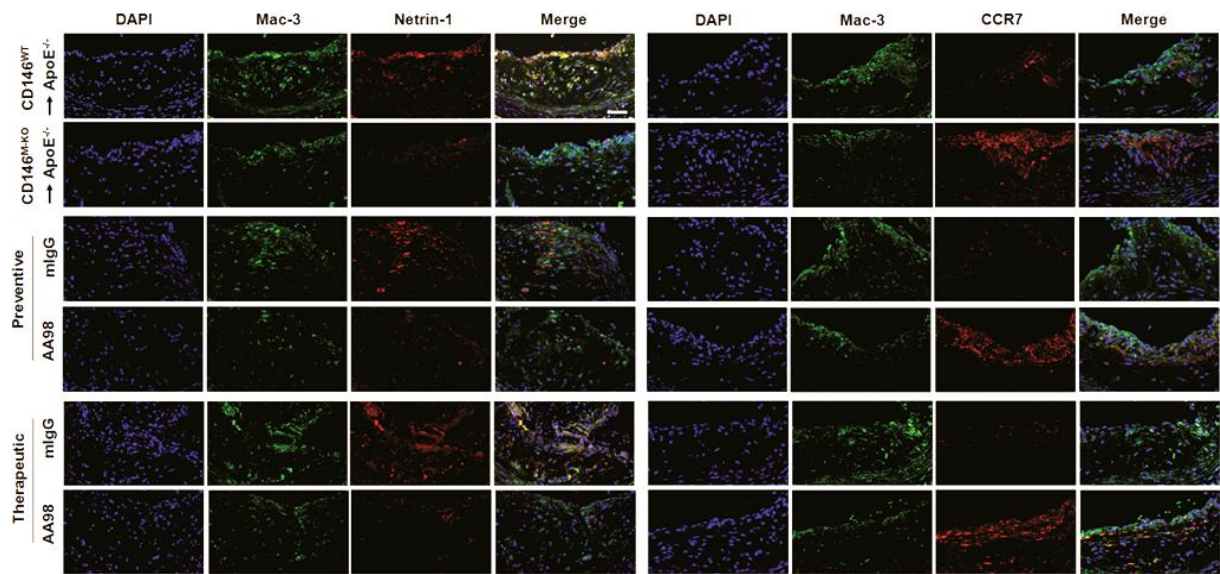

**Supplementary information, Figure S16** Immunofluorescent staining of atherosclerotic lesions isolated from  $CD146^{WT} \rightarrow ApoE^{-/-}$  or  $CD146^{M-KO} \rightarrow ApoE^{-/-}$  mice or mice preventively or therapeutically injected with the anti-CD146 antibody. The lesions were costained for Mac-3 (green) and netrin-1 or CCR7 (red). The nuclei were stained with DAPI (blue). The scale bar is 50  $\mu$ m. The data represent three independent experiments.
