# Supplementary material for: Macrophagic CD146 promotes foam cell formation and retention during atherosclerosis
Source: PubMed Central journal article supplement (PMC5339843; doi:10.1038/cr.2017.8), 2017-01-13
Supplement: cr20178x17.pdf [file cr20178x17.pdf]

**Supplementary information, Table S1 Real-time PCR primers used in this study**

| <b>Target genes</b>           | <b>sequence (5'-3')</b>                                          |
|-------------------------------|------------------------------------------------------------------|
| <b>GAPDH</b>                  | Forward: GGGAAATGAGAGAGGCCAG<br>Reverse: GGCCTGCACAAGAAGATGC     |
| <b>CD146</b>                  | Forward: CGGGTGTGCCAGGAGAG<br>Reverse: GGCGGTGCTCATATTCACCA      |
| <b>MCP-1</b>                  | Forward: GACCCCAAGAAGGAATGGGT<br>Reverse: ACAGAAGTGCTTGAGGTGGTT  |
| <b>MMP-9</b>                  | Forward: CCAGCCGACTTTTGTGGTCT<br>Reverse: TGGCCTTTAGTGTCTGGCTG   |
| <b>TNF<math>\alpha</math></b> | Forward: GTAGCCACGTCGTAGCAA<br>Reverse: TAGCAAATCGGCTGACGGTG     |
| <b>IFN<math>\gamma</math></b> | Forward: ATTGCGGGTTGTATCTGGG<br>Reverse: ACATTCGAGTGCTGTCTGGC    |
| <b>IL1-<math>\beta</math></b> | Forward: AAGCACCAGCACATTGCTTT<br>Reverse: TGTTGCCCTCAGCAGTAAGG   |
| <b>Netrin-1</b>               | Forward: CGTGGTGAAGAGCGCGT<br>Reverse: GTCACCTCAAACCTTCTTGCCG    |
| <b>CD36</b>                   | Forward: CTCCTAGTAGGCGTGGGTCT<br>Reverse: TGGCTTCAGGGAGACTGTTG   |
| <b>CCR7</b>                   | Forward: GTGGTGGCTCTCCTTGTCATT<br>Reverse: GTACGTCAGTATCACCAGCCC |
| <b>Sema 3E</b>                | Forward: TATGGCAGTGCTTGTGCTGA<br>Reverse: TCTTCAGTCCTGTCCAACGC   |
